# Supplementary material for: Novel Method for Analysis of Allele Specific Expression in Triploid Oryzias latipes Reveals Consistent Pattern of Allele Exclusion
Source: PubMed Central journal article supplement (PMC4063754; doi:10.1371/journal.pone.0100250), 2014-06-19
Supplement: pone.0100250.s006.pdf [file pone.0100250.s006.pdf]

## Short read alignment

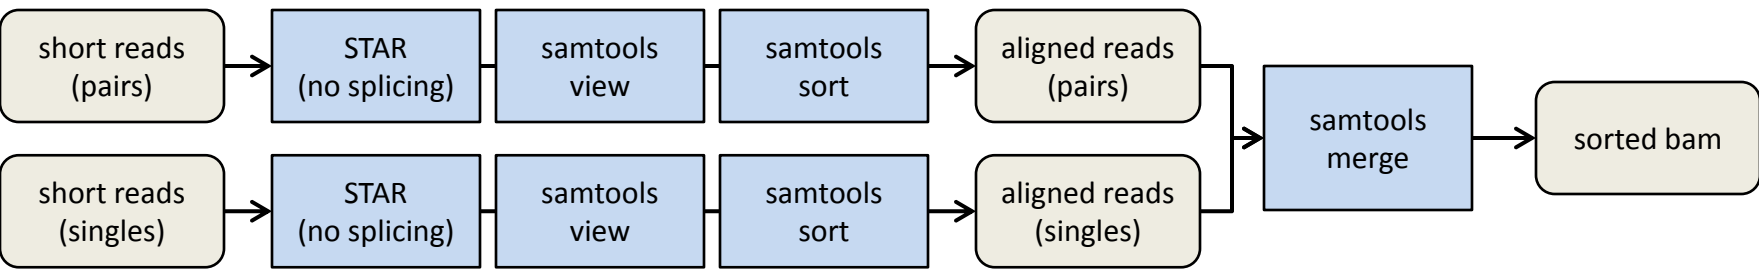

## Align paired reads

```
STAR \  
--runMode alignReads \  
--genomeLoad LoadAndKeep \  
--genomeDir ~/stardb/O.latipes_cDNA \  
--readFilesIn /path/to/reads/reads_1.fastq /path/to/reads/reads_2.fastq \  
--runThreadN $THREADS \  
--outFileNamePrefix paired/ \  
--outFilterMismatchNoverLmax 0.05 \  
--outFilterMultimapNmax 10 \  
--alignIntronMax 20 \  
--alignIntronMin 21 \  
--outSAMattributes All \  
--outStd SAM | \  
samtools view -S -h -b -u - | samtools sort -@ $THREADS - paired/paired.sorted
```

## Align single reads

```
STAR \  
--runMode alignReads \  
--genomeLoad LoadAndKeep \  
--genomeDir ~/stardb/O.latipes_cDNA \  
--readFilesIn /path/to/reads/reads_S.fastq \  
--runThreadN $THREADS \  
--outFileNamePrefix single/ \  
--outFilterMismatchNoverLmax 0.05 \  
--outFilterMultimapNmax 10 \  
--alignIntronMax 20 \  
--alignIntronMin 21 \  
--outSAMattributes All \  
--outStd SAM | \  
samtools view -S -h -b -u - | samtools sort -@ $THREADS - single/single.sorted
```

## Merge sorted aligned reads into one bam file

```
samtools merge merged.sorted.bam paired/paired.sorted.bam single/single.sorted.bam
```

# Identify SNPs

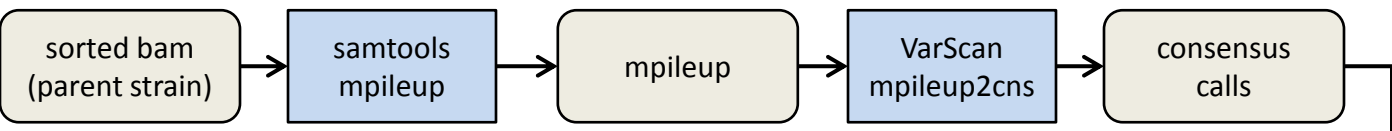

once per parent strain

```
samtools mpileup -B -f reference.fasta sorted.bam > strainA.mpileup
java -jar VarScan.v2.3.6.jar mpileup2cns strainA.mpileup \
--min-coverage 15 \
--min-reads2 5 \
--min-avg-qual 25 \
--min-var-freq 0.20 \
--p-value 0.01 \
--strand-filter 1 \
> strainA.mpileup.cns
```

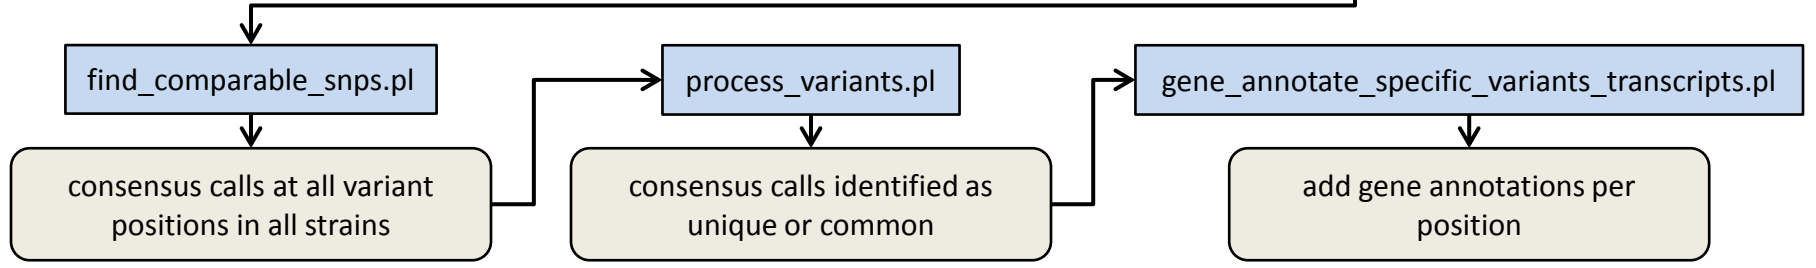

```
# Identify variants in all strains and consensus calls (as IUPAC ambiguity codes) at the same position in all parental strains
find_comparable_snps.pl reference.fasta \
strainA strainA.mpileup.cns \
strainB strainB.mpileup.cns \
strainC strainC.mpileup.cns \
> strainA_strainB_strainC.comp.cns
```

```
# Determine whether variants are uniquely found in one or more strains or whether the observed nucleotide at a given
# position and in a given strain are also seen in that position in other strains.
process_variants.pl --consensus-file=strainA_strainB_strainC.comp.cns > strainA_strainB_strainC.specific.variants
```

```
# Add annotations identifying ENSEMBL gene ID from ENSEMBL gene annotation in GTF format
gene_annotate_specific_variants_transcripts.pl genes.gtf strainA_strainB_strainC.specific.variants \
> strainA_strainB_strainC.ENSG.specific.variants
```

## Normalize for sample size

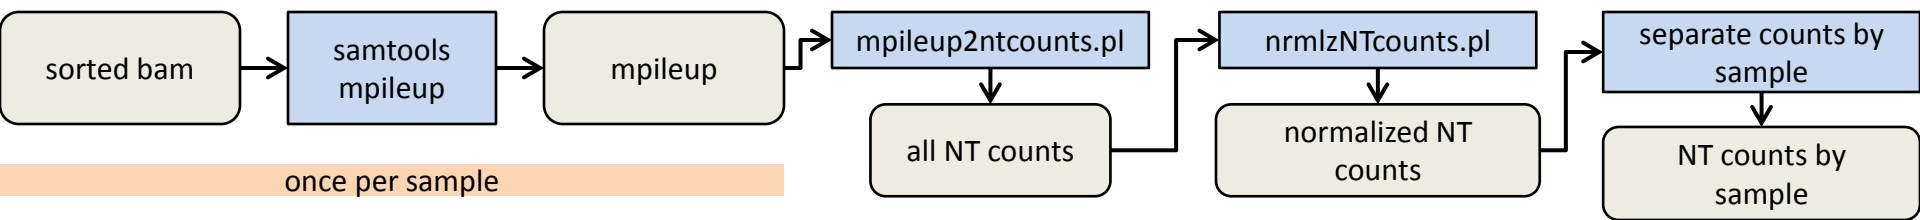

```
# Once for each sample: use samtools to generate an mpileup file from the sorted bam  
samtools mpileup -B -f refseq.fasta sample.sorted.bam > sample.mpileup
```

```
# Count occurrences of each nucleotide at each position in all samples and report as large tabular matrix  
mpileup2ntcounts.pl strainA.mpileup strainB.mpileup strainC.mpileup \  
triploidA.mpileup triploidB.mpileup triploidC.mpileup > all.ntcounts
```

```
# Normalize counts for sample size  
nrmlzNTCounts.pl all.ntcounts > all_nrml_ntcounts2
```

```
#Separate normalized counts by sample  
perl -e '$a=`head -n 1 all_nrml_ntcounts2`;  
chomp $a;  
@b=split/\t/, $a;  
$n=(@b-2)/4-1;  
for $i (0..$n) {  
    $s=$i*4+3;  
    $e=$s+3;  
    $name=$b[$s-1];  
    $name=~s/A\.\(S+)\$1/;  
    @args=("cut -f ".join(", ", 1,2,$s..$e)." all_nrml_ntcounts2 > $name.nrml.ntcounts");  
    system @args;  
}'
```

## Integrate normalized NT counts to calculate ASE

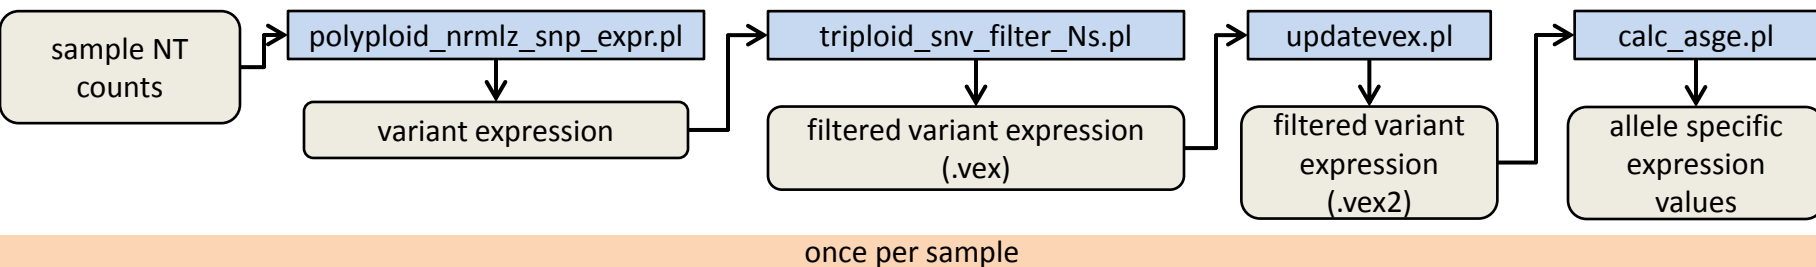

```
# Determine the expression attributable to each allele from the normalized nucleotide counts and expected nucleotides
#   at each dSNP position identified
polyploid_nrmlz_snp_expr.pl --variants= strainA_strainB_strainC.specific.variants --ntcounts=sample.nrml.ntcounts

# Filter out less informative nucleotide positions (0 counts, completely ambiguous, all NTs same, no expression expected)
triploid_snv_filter_Ns.pl --N --nonrep-zero --uncertain --all-same sample.vex > sample.f.vex

# Convert format
updatevex.pl sample.f.vex > sample.f.vex2

# Combine data from useful variant sites into per-gene allele specific expression values.
calc_asge.pl --vex2=sample.f.vex2
```
